# Supplementary material
Source: PubMed Central journal article supplement (PMC3186346)

**Table S1. Known palmitoylated platelet proteins that were not considered significantly enriched**

Several highly abundant platelet proteins that have been previously identified as palmitoylated were identified in the list of 1,300 purified proteins but failed to demonstrate a HA+/HA- ratio  $\geq 3$ . Thus, they did not meet the stringent cutoff values used to define the significant dataset. Shown is the HA+/HA- ratio and corresponding p-value.

**Table S2. Comparison of known proteins of the platelet palmitoylome with palmitoyl proteins in prostate cancer cells: Localization to lipid rafts**

The raft localization for 78 of the known palmitoylated proteins identified in the platelet palmitoylome were assigned based on the localization of these proteins identified in a proteomic study of palmitoylated proteins present in human prostate cancer cells. Of the 78 proteins, 6 were present only in lipid rafts, 33 were present only in non-raft fractions, and 39 were present in both raft and non-raft fractions.

**Figure S1. Manual verification of platelet palmitoyl protein candidates identified based on one unique peptide**

For each verified identification, the IPI accession number, protein name, peptide sequence, and annotated tandem mass spectrum were provided.

**Figure S2. A fraction of platelet TLT-1 associates with lipid rafts**

Platelets were either exposed to 100  $\mu$ M SFLLRN for 20 mins (*Activated*) or left unstimulated (*Resting*). Samples were then lysed with cold 1% Triton X-100 and subjected to sucrose gradient centrifugation (Sardjono *et al*, 2006). Equal volume aliquots of each fraction were analyzed for TLT-1 by Western blot analysis. Dot blot analysis of each fraction indicated the location of lipid rafts in the gradient at fractions two and three as demonstrated by Flotillin-1 content.

**Table S1. Previously established palmitoylated platelet proteins that did not meet the cutoff values**

| <b>Protein Name</b>                         | <b>Gene Name</b> | <b>Ratio</b> | <b>P-value</b> |
|---------------------------------------------|------------------|--------------|----------------|
| P-selectin                                  | SELP             | 0.65         | 0.726517       |
| Tubulin                                     | TUBB1            | 1.19         | 0.376411       |
| Platelet glycoprotein Ib                    | GP1BA            | 1.92         | 0.150071       |
| Platelet endothelial cell adhesion molecule | PECAM1           | 2.11         | 0.119245       |
| G(z)                                        | GNAZ             | 2.29         | 0.096928       |
| Platelet glycoprotein IX                    | GP9              | 2.65         | 0.064166       |
| CD9 antigen                                 | CD9              | 2.81         | 0.053393       |

**Table S2. Comparison of known proteins of the platelet palmitoylome with palmitoyl proteins in prostate cancer cells: localization to lipid rafts**

| <b>Protein Name</b>                                      | <b>Gene Name</b> | <b>Present in lipid raft fraction?</b> |
|----------------------------------------------------------|------------------|----------------------------------------|
| 55 kDa erythrocyte membrane protein                      | MPP1             | Non-raft                               |
| Abhydrolase domain-containing protein FAM108B1           | FAM108B1         | Both                                   |
| Acid ceramidase                                          | ASAH1            | Non-raft                               |
| ADP-ribosylation factor-like protein 15                  | ARL15            | Non-raft                               |
| ATP-binding cassette sub-family B member 6               | ABCB6            | Non-raft                               |
| Calnexin                                                 | CANX             | Both                                   |
| Casein kinase I gamma 1 isoform                          | CSNK1G1          | Raft                                   |
| Casein kinase I isoform gamma-3                          | CSNK1G3          | Raft                                   |
| Cation-dependent mannose-6-phosphate receptor            | M6PR             | Both                                   |
| CD151 antigen                                            | CD151            | Non-raft                               |
| CD63 antigen                                             | CD63             | Non-raft                               |
| CDC42 small effector protein 2                           | CDC42SE2         | Non-raft                               |
| Cell division control protein 42 homolog                 | CDC42            | Non-raft                               |
| Choline transporter-like protein 1                       | CTL1             | Non-raft                               |
| Choline transporter-like protein 2                       | CTL2             | Non-raft                               |
| Claudin-3                                                | CLDN3            | Both                                   |
| CTD small phosphatase-like protein                       | CTDSPL           | Non-raft                               |
| Cytochrome b5 type B                                     | CYB5B            | Non-raft                               |
| Desmoplakin                                              | DSP              | Both                                   |
| Disheveled-associated activator of morphogenesis 1       | DAAM1            | Non-raft                               |
| DnaJ homolog subfamily C member 5                        | DNAJC5           | Non-raft                               |
| Endothelin-converting enzyme 1                           | ECE1             | Non-raft                               |
| ErbB2-interacting protein                                | ERBB2IP          | Both                                   |
| F-box/LRR-repeat protein 20                              | FBXL20           | Non-raft                               |
| Flotillin-1                                              | FLOT1            | Both                                   |
| Flotillin-2                                              | FLOT2            | Both                                   |
| G(i) alpha-1                                             | GNAI1            | Both                                   |
| G(i) alpha-2                                             | GNAI2            | Both                                   |
| G(i) alpha-3                                             | GNAI3            | Both                                   |
| G(q) alpha                                               | GNAQ             | Both                                   |
| G(s) alpha                                               | GNAS             | Both                                   |
| Galpha-11                                                | GNA11            | Both                                   |
| Galpha-13                                                | GNA13            | Both                                   |
| Glutaminase kidney isoform                               | GLS              | Non-raft                               |
| Golgin subfamily A member 7                              | GOLGA7           | Both                                   |
| GTPase Hras                                              | HRAS             | Non-raft                               |
| GTPase Nras                                              | NRAS             | Both                                   |
| HLA class I histocompatibility antigen, B-27 alpha chain | HLA-B            | Both                                   |
| Linker for activation of T-cells family member 1         | LAT              | Raft                                   |
| Linker for activation of T-cells family member 2         | LAT2             | Raft                                   |
| Multidrug resistance-associated protein 4                | ABCC4            | Non-raft                               |

| <b>Protein Name</b>                                             | <b>Gene Name</b> | <b>Present in lipid raft fraction?</b> |
|-----------------------------------------------------------------|------------------|----------------------------------------|
| Phosphatidylinositol 4-kinase type 2-alpha                      | PI4K2A           | Both                                   |
| Phosphatidylinositol 4-kinase type 2-beta                       | PI4K2B           | Non-raft                               |
| Phospholipid scramblase 1                                       | PLSCR1           | Both                                   |
| Phospholipid scramblase 3                                       | PLSCR3           | Non-raft                               |
| Pituitary tumor-transforming gene 1 protein-interacting protein | PTTG1IP          | Both                                   |
| PRA1 family protein 2                                           | PRAF2            | Non-raft                               |
| Probable phospholipid-transporting ATPase IF                    | ATP11B           | Non-raft                               |
| Protein FAM49B                                                  | FAM49B           | Both                                   |
| Protein LYRICgene-1 protein                                     | LYRIC            | Both                                   |
| Protein tweety homolog 3                                        | TTYH3            | Non-raft                               |
| Proto-oncogene tyrosine-protein kinase Yes                      | YES1             | Both                                   |
| Ras-related protein Rap-2a                                      | RAP2A            | Non-raft                               |
| Ras-related protein Rap-2b                                      | RAP2B            | Both                                   |
| Ras-related protein Rap-2c                                      | RAP2C            | Non-raft                               |
| Ras-related protein R-Ras                                       | RRAS             | Both                                   |
| Regulator of G-protein signaling 19                             | RGS19            | Raft                                   |
| Secretory carrier-associated membrane protein 1                 | SCAMP1           | Both                                   |
| Secretory carrier-associated membrane protein 2                 | SCAMP2           | Non-raft                               |
| Secretory carrier-associated membrane protein 3                 | SCAMP3           | Both                                   |
| Secretory carrier-associated membrane protein 4                 | SCAMP4           | Non-raft                               |
| Sn1-specific diacylglycerol lipase beta                         | DAGLB            | Non-raft                               |
| SNAP-23                                                         | SNAP23           | Both                                   |
| Sodium/potassium-transporting ATPase subunit alpha-1            | ATP1A1           | Both                                   |
| Stomatin                                                        | STOM             | Both                                   |
| Syntaxin-8                                                      | STX8             | Both                                   |
| Tetraspanin-9                                                   | TSPAN9           | Non-raft                               |
| Trafficking protein particle complex subunit 3                  | TRAPPC3          | Both                                   |
| Transferrin receptor protein 1                                  | TFRC             | Both                                   |
| Transmembrane protein 55B                                       | TMEM55B          | Both                                   |
| Transmembrane protein 63A                                       | TMEM63A          | Non-raft                               |
| Transmembrane protein 63B                                       | TMEM63B          | Both                                   |
| Type I inositol-1,4,5-trisphosphate 5-phosphatase               | INPP5A           | Raft                                   |
| Tyrosine-protein kinase Lyn                                     | LYN              | Both                                   |
| UPF0404 protein C11orf59                                        | C11orf59         | Both                                   |
| Vesicle-associated membrane protein 3                           | VAMP3            | Both                                   |
| Vesicle-associated membrane protein 4                           | VAMP4            | Non-raft                               |
| Vesicle-associated membrane protein 7                           | VAMP7            | Non-raft                               |

Known palmitoylated proteins identified in this study were assigned as raft, non-raft or present in both fractions based on a comparison with a previous study detailing the localization of palmitoylated proteins found in human prostate cancer cells (Yang *et al*, 2010).

**Figure S1. Manual verification of platelet palmitoyl protein candidates identified based on one unique peptide**

IPI00290452 Transmembrane BAX inhibitor motif-containing protein 1

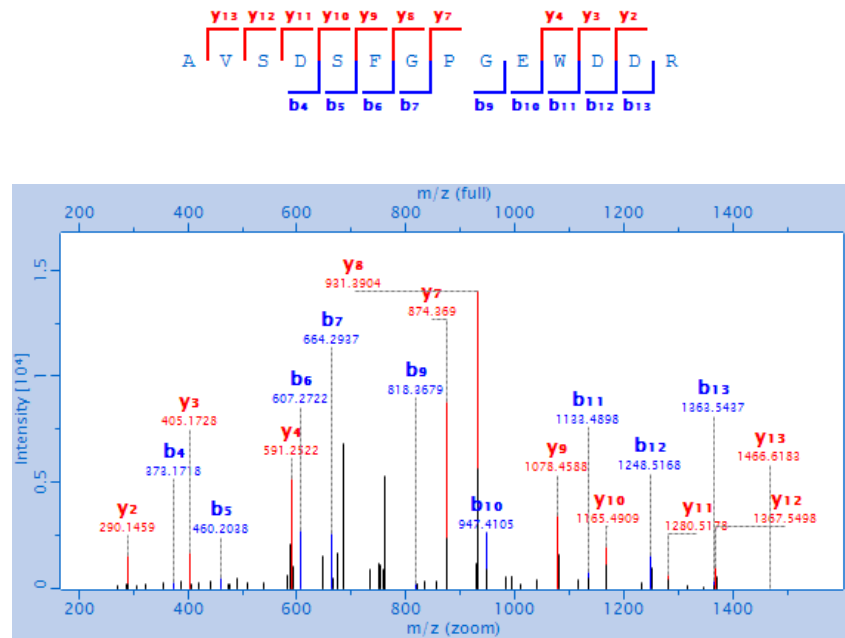

IPI00002127 Dynein heavy chain 1, axonemal

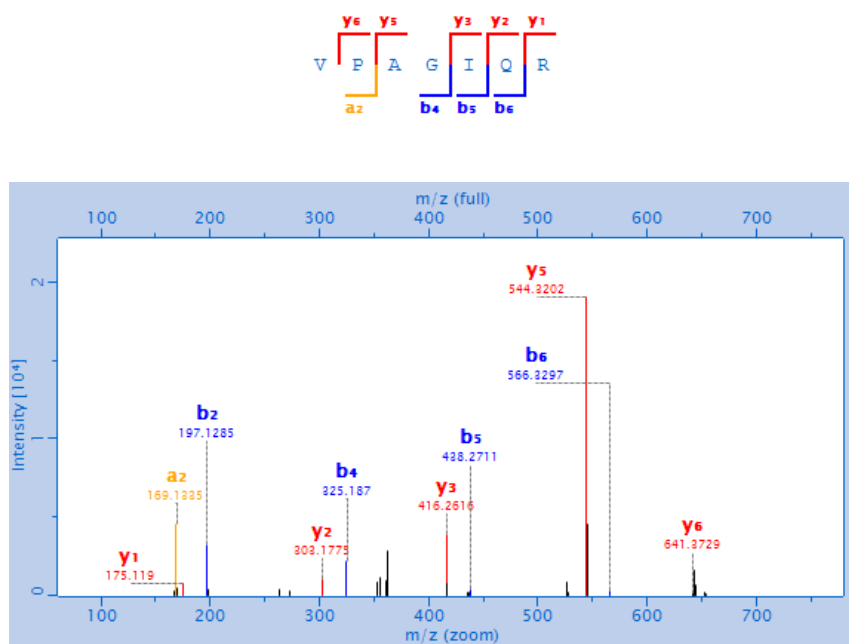

IPI00794461 Histone H2B type 1-N

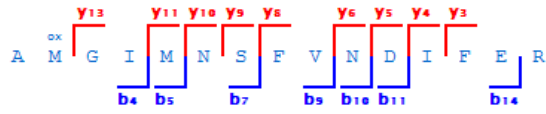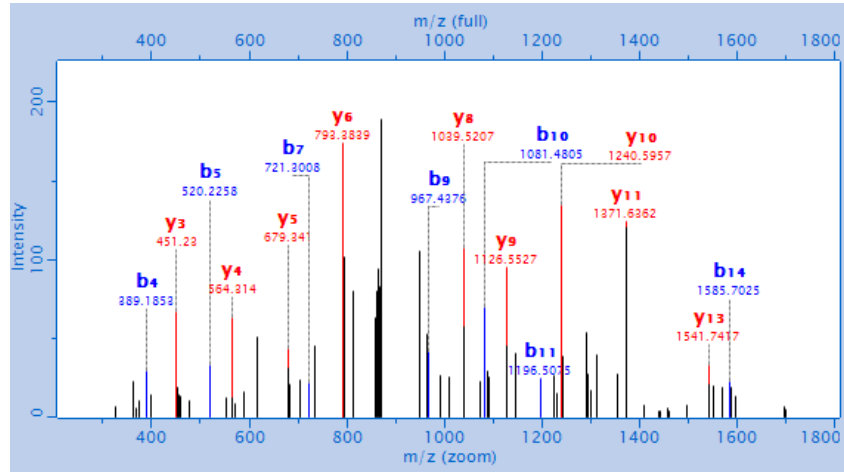

IPI00872769 Leptin receptor gene-related protein

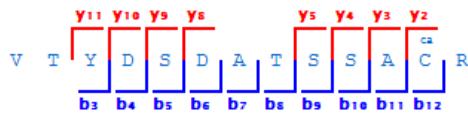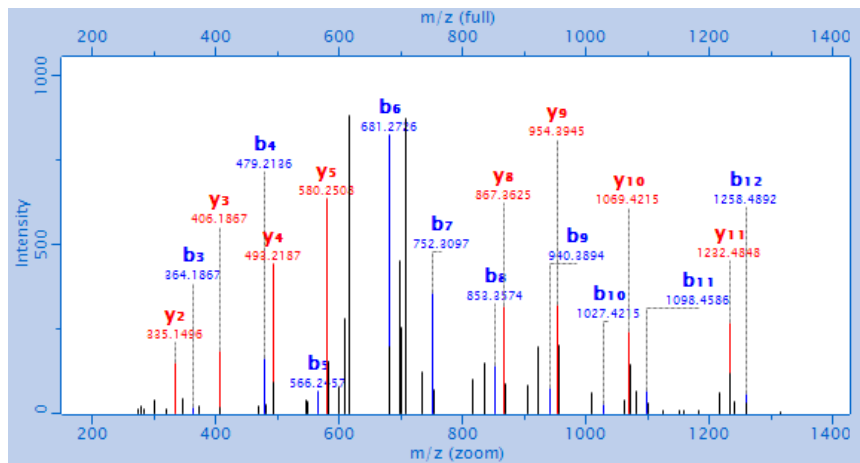

IPI00303699 Calcium release-activated calcium channel protein 1

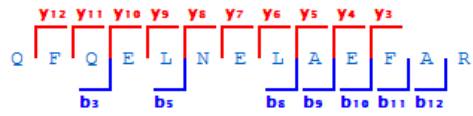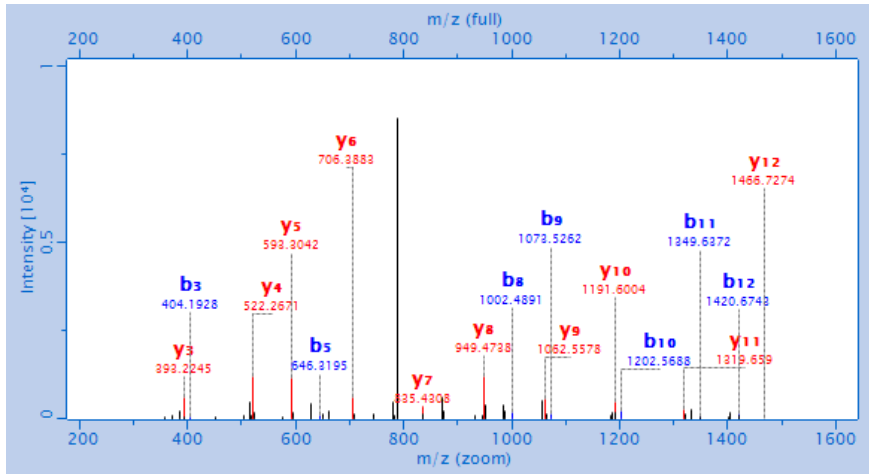

IPI00171626 Lysophosphatidylcholine acyltransferase 1

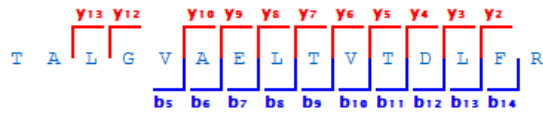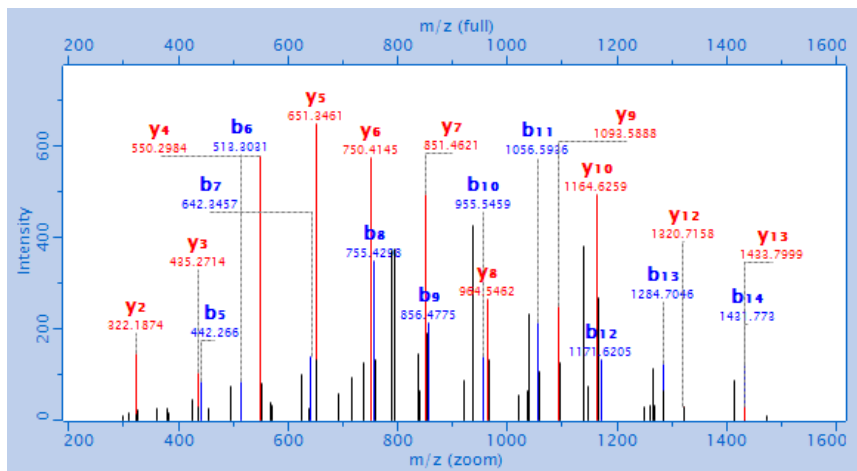

IPI00298612 3-methyl-2-oxobutanoate dehydrogenase (lipoamide) kinase, mitochondrial

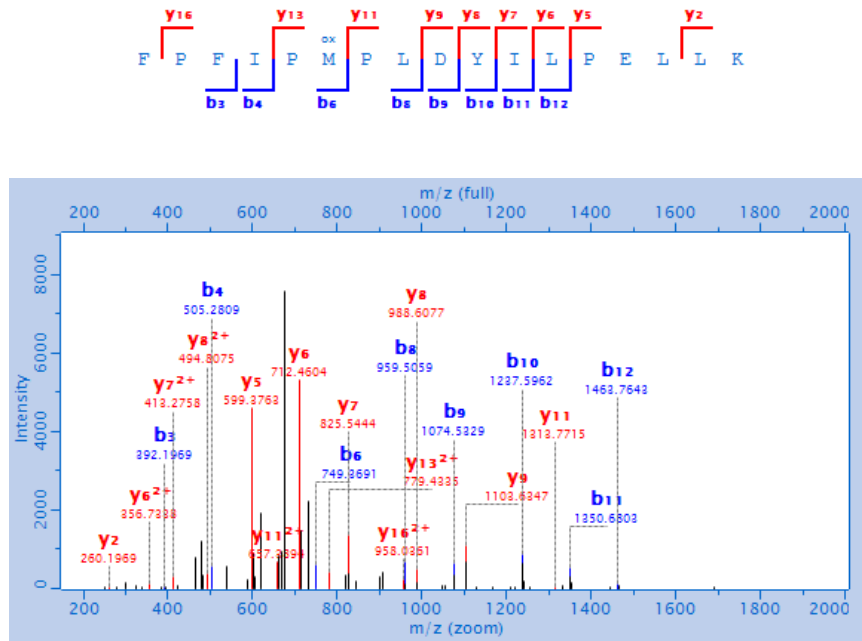

IPI00477518 Placenta derived apoptotic factor

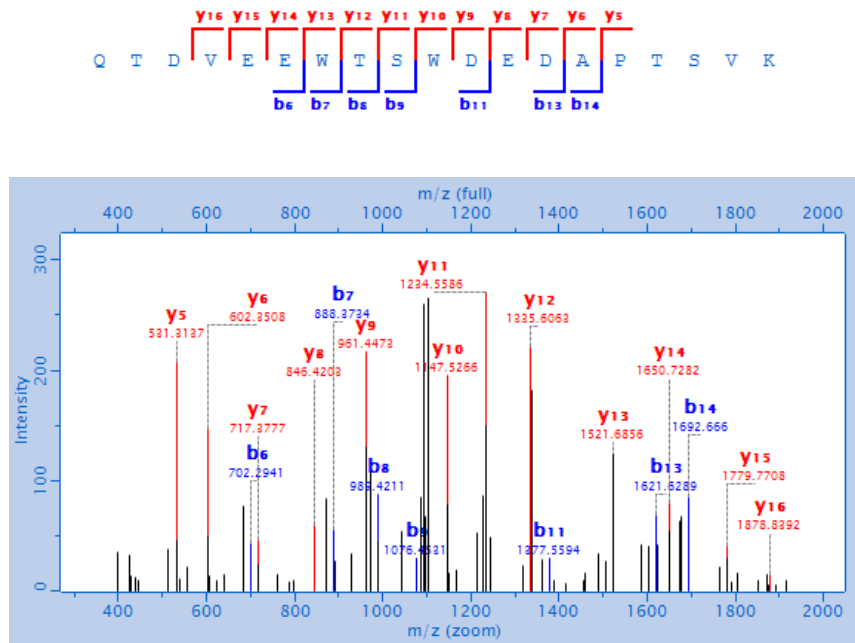



IPI00329410 Dolichyldiphosphatase 1

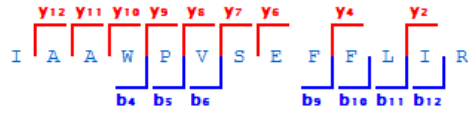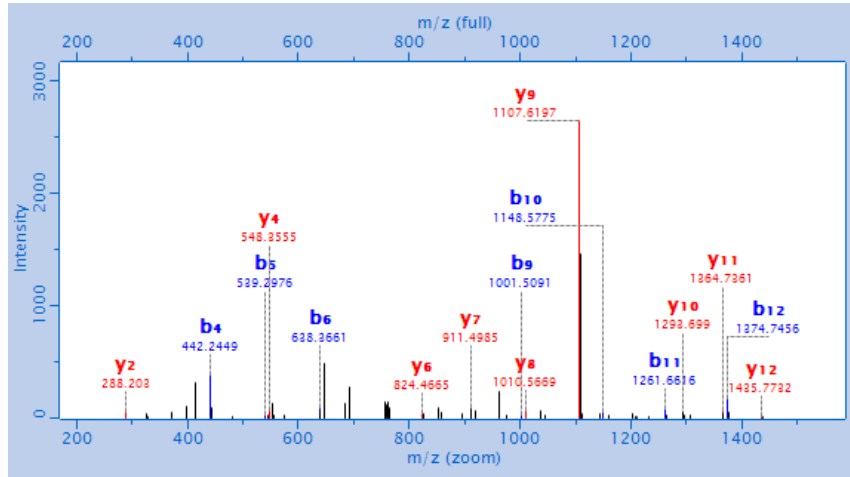

IPI00022471 Minor histocompatibility protein HA-1

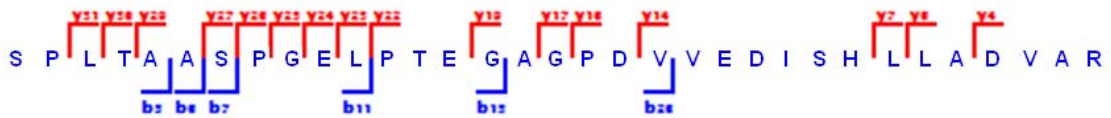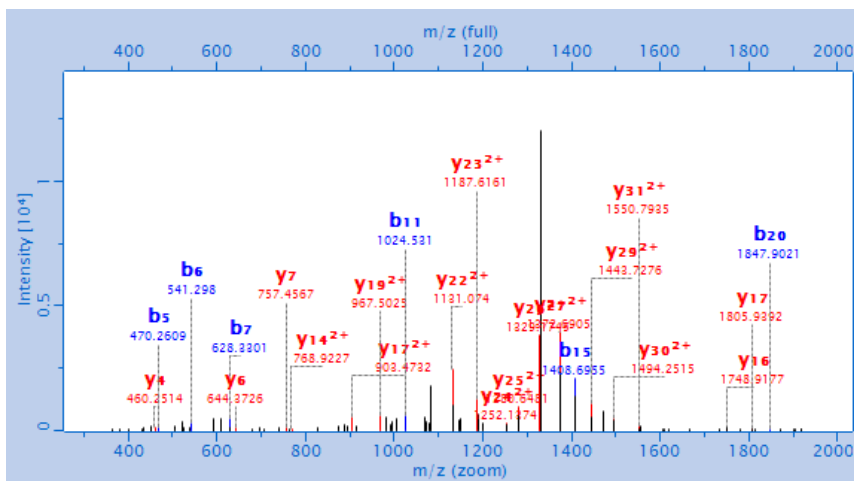

IPI00183603 Oligosaccharyltransferase complex subunit OSTC

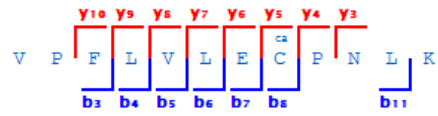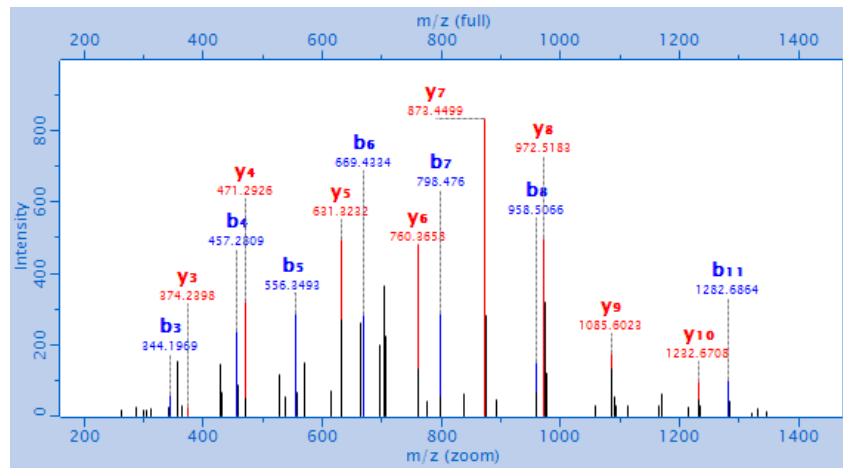

IPI00759799 HBeAg-binding protein 2 binding protein A

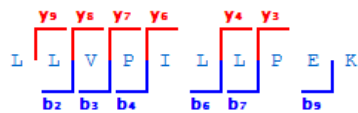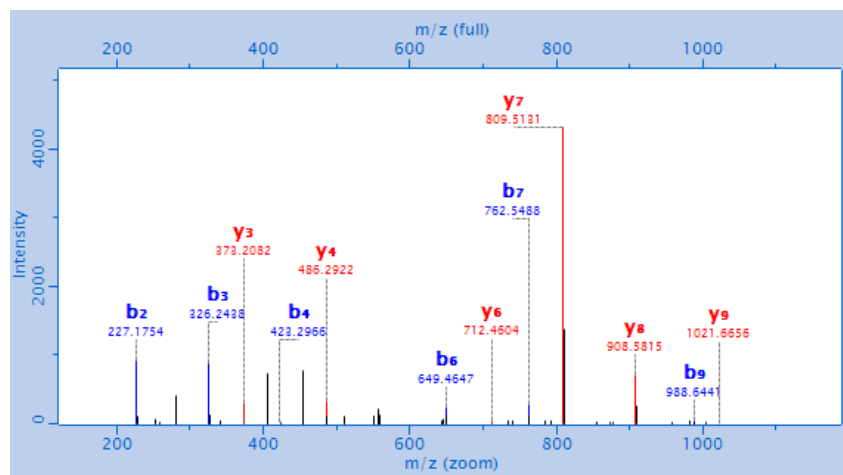

IPI00056310 Secretory carrier-associated membrane protein 4

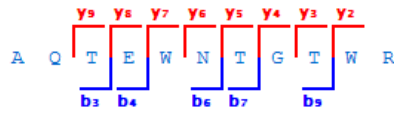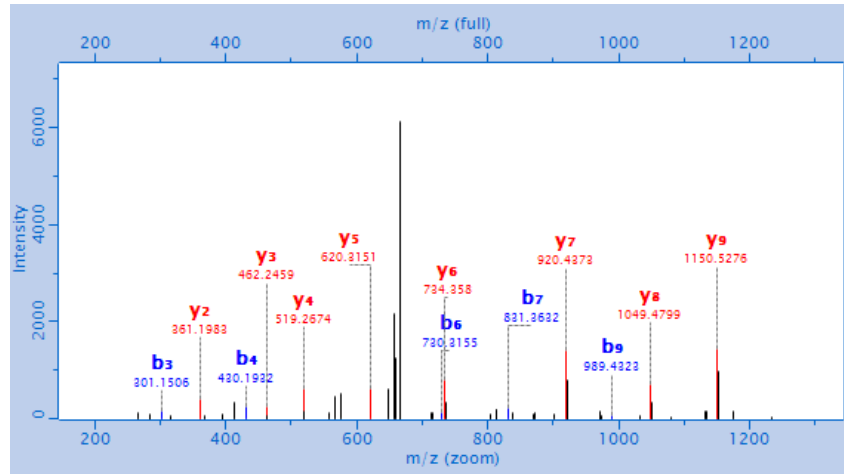

IPI00012511 Rho-related GTP-binding protein RhoQ

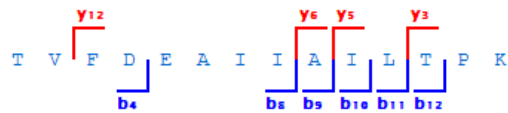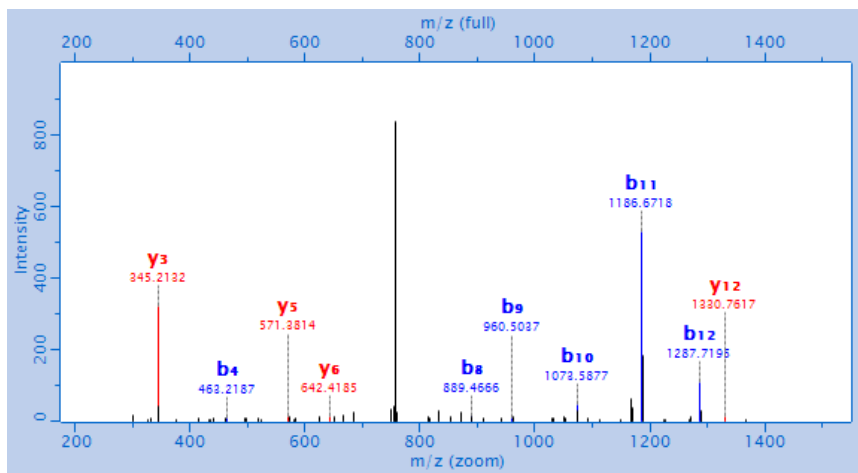

IPI00336034 Syntaxis-2

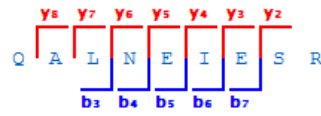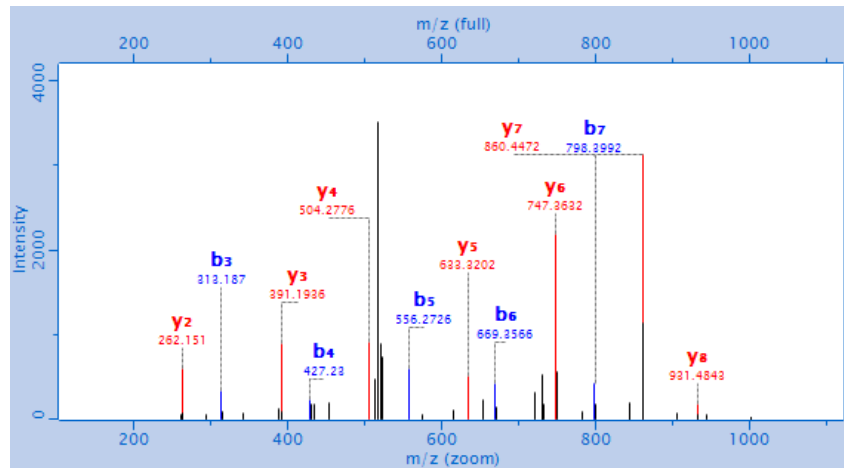

IPI00305212 COMM domain-containing protein 9

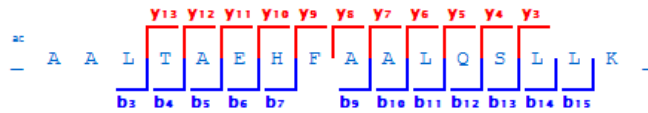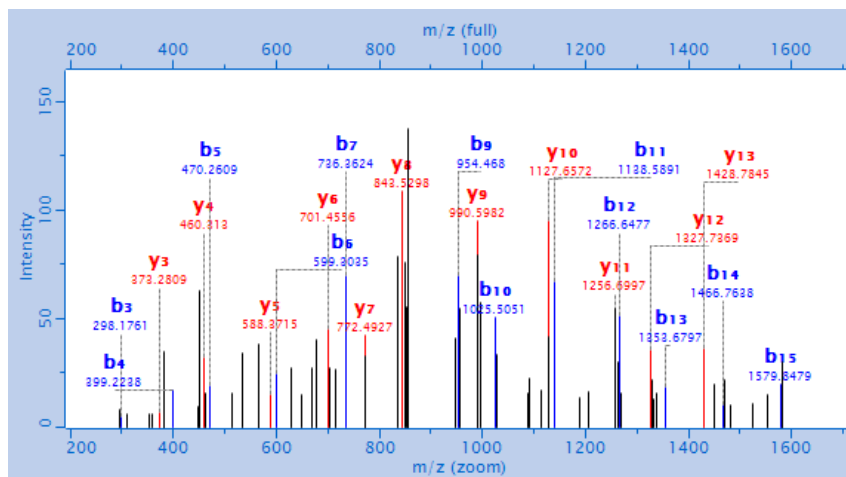

IPI00303726 Interferon-induced transmembrane protein 3

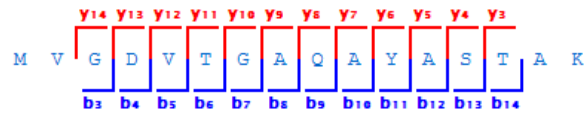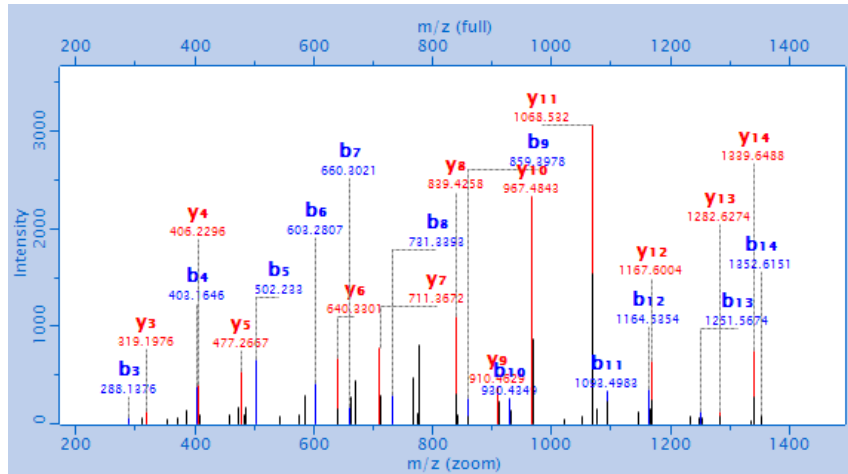

IPI00024972 CDC42 small effector protein 1

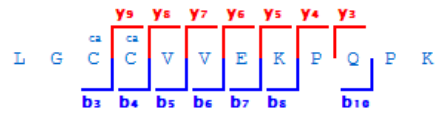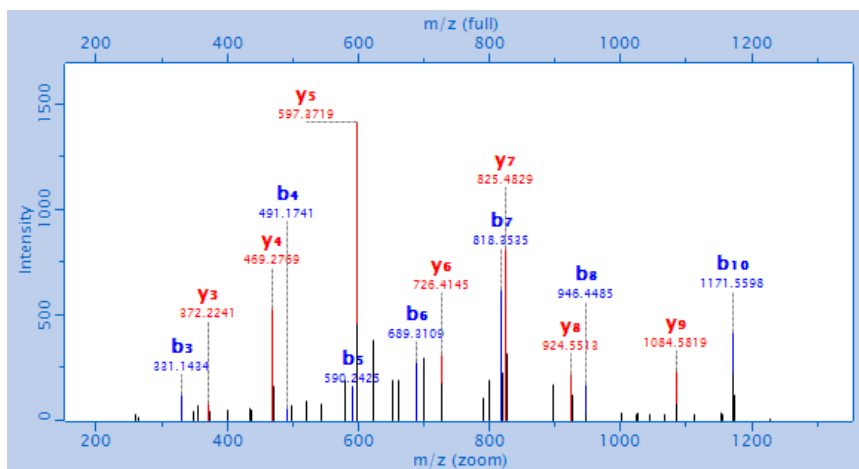

IPI00384349 Protein FAM78A

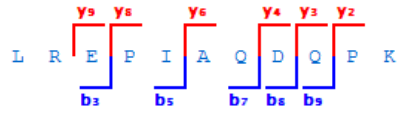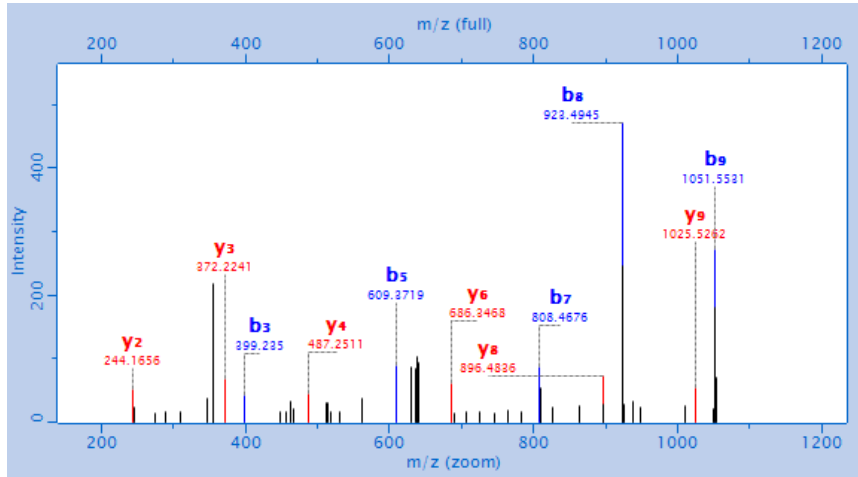

IPI00018033 Nuclear receptor subfamily 4 group A member 2

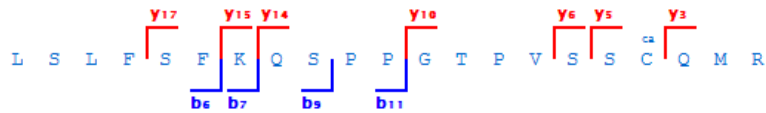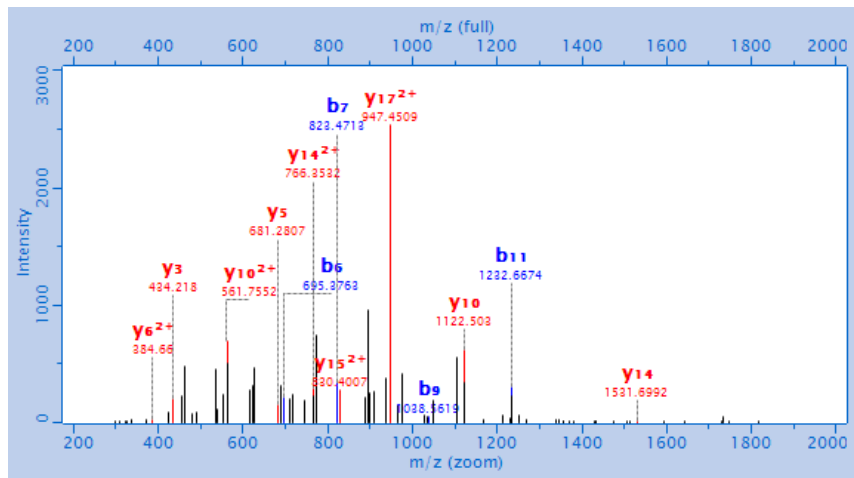

**Figure S2. Western blot analysis of TLT-1 in sucrose density gradient fractions in resting and SFLLRN-activated platelets**

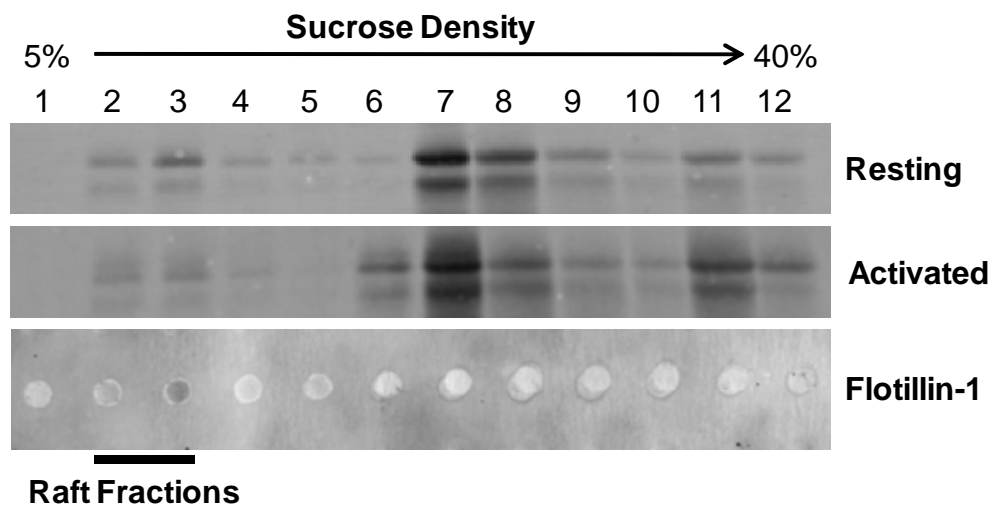

Supplement: supp_blood-2011-05-353078_Document1.pdf [file supp_blood-2011-05-353078_Document1.pdf]
